# Supplementary material
Source: publisher figshare collection journal article supplement (https://acs.figshare.com/ndownloader/files/4006855)
Supplement: Supplementary file 1 [file 4006855]

**Supporting Information:**

**Graphene on Ru(0001) Moiré Corrugation Studied by**

**Scanning Tunneling Microscopy on**

**Au/graphene/Ru(0001) Heterostructures**

R. Cortés,<sup>†</sup> D. P. Acharya,<sup>†,¶</sup> C. V. Ciobanu,<sup>‡</sup> E. Sutter,<sup>†</sup> and P. Sutter<sup>\*,†</sup>

*Center for Functional Nanomaterials, Brookhaven National Laboratory, Upton, New York  
11973, United States, and Department of Mechanical Engineering & Materials Science  
Program, Colorado School of Mines, Golden, Colorado 80401, United States*

E-mail: psutter@bnl.gov

---

<sup>\*</sup>To whom correspondence should be addressed

<sup>†</sup>Center for Functional Nanomaterials, Brookhaven National Laboratory, Upton, New York 11973, United States

<sup>‡</sup>Department of Mechanical Engineering & Materials Science Program, Colorado School of Mines, Golden, Colorado 80401, United States

<sup>¶</sup>Current affiliation: Global Foundries, Malta, NY 12020, United States

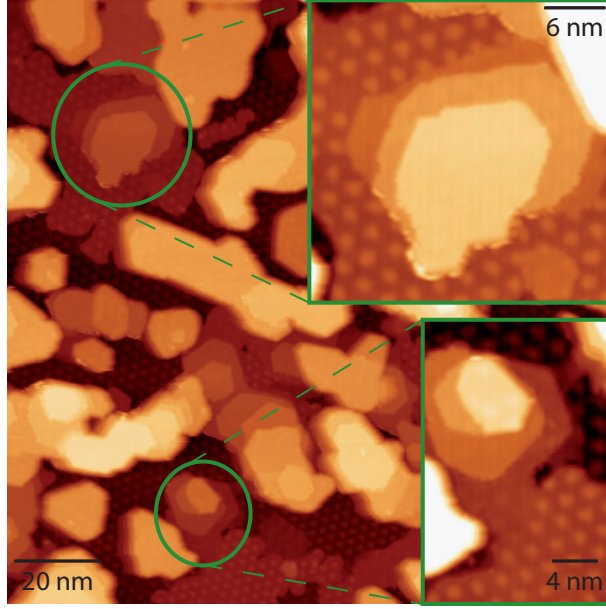

**Figure S1:** Overview STM image of room temperature deposited Au on monolayer graphene/Ru(0001), observed by UHV STM at 77 K ( $V_{sample} = -0.27$  V,  $I = 0.46$  nA). Circles mark islands shown in the close-up views whose terraces are partially or completely flat.

## Equation for $A(h)$

The general equations of elasticity for the case of zero body forces can be written in terms of the displacement field  $\mathbf{u}$  as:<sup>1</sup>

$$\nabla(\nabla \cdot \mathbf{u}) + (1 - 2\nu)\Delta \mathbf{u} = 0, \quad (1)$$

where  $\nu$  is the Poisson ratio of the material. Equation (1) admits solutions of the Papkovitch-Neuber form,<sup>2-4</sup> *i.e.*, with the displacement components  $u_i$  ( $i = 1, 2, 3$ ) expressed in terms of a scalar field  $\phi$  and a vector field  $\psi \equiv (\psi_1, \psi_2, \psi_3)$  as

$$u_i = \psi_i - \frac{1}{4(1 - \nu)} \frac{\partial}{\partial x_i} (\phi + x\psi_1 + y\psi_2 + z\psi_3), \quad (2)$$

where  $\phi$  and  $\psi_i$  ( $i = 1, 2, 3$ ) are harmonic functions to be determined. The boundary conditions that we impose on the film which extends indefinitely in the  $x$  and  $y$  directions consist in prescribed displacements on the lower surface of the film, and zero applied stress on the upper surface:

$$\mathbf{u} = (0, 0, A_0 \sin \frac{x}{\lambda}), \text{ on the lower boundary } (z = 0) \quad (3)$$

$$\sigma_z = 0, \text{ on the upper boundary } (z = h). \quad (4)$$

Using Hooke's law and the definition of normal strains in terms of displacements (*e.g.*,  $\epsilon_1 = \partial u_1 / \partial x$ ), Eq. (4) can be cast as

$$\frac{\partial u_1}{\partial x} + \frac{\partial u_2}{\partial y} + \frac{1 - \nu}{\nu} \frac{\partial u_3}{\partial z} = 0, \text{ on } z = h. \quad (5)$$

Since the film extends indefinitely in the  $(x, y)$  plane, the requirement of bounded, spatially periodic solutions implies that  $\psi_1$  and  $\psi_2$  should vanish everywhere, which leads to

$u_2(x, y, z) = 0$ . The other two harmonic functions,  $\phi$  and  $\psi_3$ , can now be uniquely chosen as combinations of exponential and sinus functions:

$$\phi = (Ce^{\frac{z}{\lambda}} + De^{-\frac{z}{\lambda}}) \sin \frac{x}{\lambda} \quad (6)$$

$$\psi_3 = (Ee^{\frac{z}{\lambda}} + Fe^{-\frac{z}{\lambda}}) \sin \frac{x}{\lambda} \quad (7)$$

Substituting Eqs. (6,7) in the boundary conditions Eqs. (3) and (5) leads to a linear system for the coefficients  $C$ ,  $D$ ,  $E$ , and  $F$ :

$$\begin{pmatrix} 1 & 1 & 0 & 0 \\ -1 & 1 & \lambda(3-4\nu) & \lambda(3-4\nu) \\ e^{h/\lambda} & -e^{-h/\lambda} & (h-(1-2\nu)\lambda)e^{h/\lambda} & (-h-(1-2\nu)\lambda)e^{-h/\lambda} \\ e^{h/\lambda} & e^{-h/\lambda} & (h-2(1-\nu)\lambda)e^{h/\lambda} & (h+2(1-\nu)\lambda)e^{-h/\lambda} \end{pmatrix} \begin{pmatrix} C \\ D \\ E \\ F \end{pmatrix} = \begin{pmatrix} 0 \\ 4A_0\lambda(1-\nu) \\ 0 \\ 0 \end{pmatrix}. \quad (8)$$

With the solutions of the linear system (8) in place, we can substitute back into Eqs. (6, 7) and (2) to determine the  $u_3$  component of the displacement field. At  $z = h$ , the amplitude  $A(h)$  of this component, *i.e.*, of the the corrugation of the upper surface, works out to be:

$$A(h) = 4A_0(1-\nu) \frac{2(1-\nu) \cosh(h/\lambda) + (h/\lambda) \sinh(h/\lambda)}{2h^2/\lambda^2 + 5 - 4\nu(3-2\nu) + (3-4\nu) \cosh(2h/\lambda)}. \quad (9)$$

When using Eq. (9) to compare to experimental data pertaining to Au/graphene/Ru(0001) heterostructures, several things have to be noted. Firstly, the theory is derived for the Au film alone in absence of any graphene/Ru substrate. The perturbation is imposed on the lowest Au atomic layer, and the results should hold (at least qualitatively) for the Au film and not for the graphene underneath. As described in the text of the article, graphene can have either chemical or physical bonding with the Au, which cannot be captured by elasticity equations. We therefore derived Eq. (9) with displacements imposed on the lowest surface of the Au film and under the assumption that those imposed displacements are not changed

during deposition of Au in any way.

Secondly, when dealing with a bilayer of Au which only has a thickness of  $3 \text{ \AA}$ , there is a possibility that the numerical value of the Poisson ratio used in Eq. (9) changes because the Au film is ultra-thin, which can lead to changes in the predictions based on the elasticity equations. In order to test the sensitivity of the result of Eq. (9) to the value of  $\nu$ , we have first used DFT calculations to compute the Poisson ratio as a function of the thickness of the Au layer from 2 to 6 ML. The parameters of these DFT calculations are the same as those described in the main text, except for the  $k$ -point grid which has been increased to  $11 \times 11 \times 1$ . We have found that for a bilayer of Au, the Poisson ratio is 0.347, which differs significantly from the bulk value of 0.42. However, it turns out that the normalized amplitudes  $A(h)/A_0$  given by Eq. (9) do not change by more than 4 % when the Poisson ratio varies in the range  $0.35 \leq \nu \leq 0.42$ . Therefore, at least qualitatively, it is warranted to use Eq. (9) for comparison with experiments.

## References

- (1) Landau, L.; Lifshitz, E. *Theory of Elasticity*; Pergamon: Oxford, UK, 1970.
- (2) Papkovitch, P. Expression for the General Integral of the Principal Equations of the Theory of Elasticity by Harmonic Functions. *Izvest. Akad. Nauk. SSSR* **1932**, *10*, 1425–1435.
- (3) Papkovitch, P. Solution Générale des Équations Différentielles Fondamentales d’élasticité Exprimée par Trois Fonctions Harmoniques. *Comptes Rendus, Acad. de Sci., Paris* **1932**, *195*, 513–515.
- (4) Neuber, H. Ein neuer Ansatz zur Lösung räumlicher Probleme der Elastizitätstheorie. Der Hohlkegel unter Einzellast als Beispiel. *Z. angew. Math. Mech.* **1934**, *14*, 203–212.
